# Supplementary material for: Understanding The Surface Integrity of Laser Surface Engineered Tungsten Carbide
Source: Research Square preprint supplement (doi:10.21203/rs.3.rs-425549/v1), 2021-05-18
Supplement: Supplementary file 1 [file 7ef1b1de6ac052ecf2a6a8fb.xlsx]

## Sheet: DOE data
Data
Unprocesssed Surface Spk			0.9033
	Ra, V			Ra, H			Spk				Mean
Experiement	1	2	3	1	2	3	1	2	3		Ra, V	Ra, H	Spk	Min	Max
0	0.6688	0.5897	0.6822	0.7265	0.5691	0.8385	1.123	0.907	1.554		0.6469	0.711367	1.19467	0.907	1.554
1	0.6095	0.5604	0.469	0.689	0.5293	0.6235	1.261	0.9497	1.124		0.5463	0.613933	1.11157	0.9497	1.261
2	0.4896	0.6349	0.4554	0.7165	0.4734	0.6408	1.243	1.105	1.259		0.526633	0.610233	1.20233	1.105	1.259
3	0.8401	0.5151	0.5061	0.4552	0.71	0.4994	0.9387	0.9997	1.079		0.620433	0.554867	1.0058	0.9387	1.079
4	0.6299	0.7054	0.6437	0.4443	0.5615	0.5193	0.9807	0.7881	0.9607		0.659667	0.508367	0.909833	0.7881	0.9807
5	0.5725	0.3549	0.4539	0.7556	0.4861	0.6031	1.1297	0.8958	1.023		0.460433	0.614933	1.01617	0.8958	1.1297
6	0.9527	1.579	0.9231	1.429	1.0064	1.238	2.017	2.1597	2.338		1.1516	1.22447	2.17157	2.017	2.338
7	0.5757	0.6073	0.576	0.5277	0.6334	0.6622	1.343	1.6036	1.874		0.586333	0.607767	1.60687	1.343	1.874
8	0.5418	0.9251	0.5599	0.8184	0.6369	0.8284	1.165	1.1885	1.377		0.6756	0.761233	1.2435	1.165	1.377
9	0.4572	0.6082	0.4907	0.4702	0.5539	0.6027	0.8476	0.9018	1.303		0.5187	0.542267	1.01747	0.8476	1.303
10	0.5821	0.743	0.7049	0.8097	0.7274	0.6668	0.9803	0.836	1.085		0.676667	0.734633	0.9671	0.836	1.085
11	0.4722	0.5265	0.359	0.5386	0.3996	0.5103	0.794	0.9238	1.139		0.452567	0.482833	0.952267	0.794	1.139
12	0.5379	0.57	0.4959	0.7411	0.8166	0.8842	1.204	1.3807	1.482		0.5346	0.813967	1.35557	1.204	1.482
13	0.6695	0.5234	0.4599	0.5517	0.857	0.8073	0.9873	0.9751	1.191		0.550933	0.738667	1.05113	0.9751	1.191
14	0.8031	0.7338	0.6929	0.4278	0.9489	0.6365	1.751	1.0201	1.152		0.743267	0.671067	1.3077	1.0201	1.751
15	0.5828	2.4631	1.354	2.198	1.2253	2.234	4.373	4.4201	4.755		1.46663	1.88577	4.51603	4.373	4.755
16	0.6775	0.8697	0.6289	0.981	0.6162	0.9417	1.475	1.1944	1.318		0.725367	0.8463	1.32913	1.1944	1.475
Experiement	ψ	f	v	d	Power (P)	Frequency (F)	Speed (S)	Pitch	Ra, V	Ra, H	Spk	% Deviation	P*F	P*S	P*D	F*S	F*D	S*D	P*F*S*D	P*F*S	F*S*D	P*S*D	P*F*D
0	0	0	0	0	50	35	1000	0.04	0.6469	0.711367	1.19467	0.322558	0	0	0	0	0	0	0	0	0	0	0
1	-1	-1	-1	-1	25	17.5	500	0.02	0.5463	0.613933	1.11157	0.230562	1	1	1	1	1	1	1	-1	-1	-1	-1
2	1	-1	-1	-1	75	17.5	500	0.02	0.526633	0.610233	1.20233	0.331045	-1	-1	-1	1	1	1	-1	1	-1	1	1
3	-1	1	-1	-1	25	52.5	500	0.02	0.620433	0.554867	1.0058	0.113473	-1	1	1	-1	-1	1	-1	1	1	-1	1
4	-1	-1	1	-1	25	17.5	1500	0.02	0.659667	0.508367	0.909833	0.00723274	1	-1	1	-1	1	-1	-1	1	1	1	-1
5	-1	-1	-1	1	25	17.5	500	0.06	0.460433	0.614933	1.01617	0.124949	1	1	-1	1	-1	-1	-1	-1	1	1	1
6	1	1	-1	-1	75	52.5	500	0.02	1.1516	1.22447	2.17157	1.40404	1	-1	-1	-1	-1	1	1	-1	1	1	-1
7	1	-1	1	-1	75	17.5	1500	0.02	0.586333	0.607767	1.60687	0.778885	-1	1	-1	-1	1	-1	1	-1	1	-1	1
8	1	-1	-1	1	75	17.5	500	0.06	0.6756	0.761233	1.2435	0.376619	-1	-1	1	1	-1	-1	1	1	1	-1	-1
9	-1	1	1	-1	25	52.5	1500	0.02	0.5187	0.542267	1.01747	0.126388	-1	-1	1	1	-1	-1	1	-1	-1	1	1
10	-1	1	-1	1	25	52.5	500	0.06	0.676667	0.734633	0.9671	0.0706299	-1	1	-1	-1	1	-1	1	1	-1	1	-1
11	-1	-1	1	1	25	17.5	1500	0.06	0.452567	0.482833	0.952267	0.0542086	1	-1	-1	-1	-1	1	1	1	-1	-1	1
12	1	1	1	-1	75	52.5	1500	0.02	0.5346	0.813967	1.35557	0.500683	1	1	-1	1	-1	-1	-1	1	-1	-1	-1
13	-1	1	1	1	25	52.5	1500	0.06	0.550933	0.738667	1.05113	0.163659	-1	-1	-1	1	1	1	-1	-1	1	-1	-1
14	1	-1	1	1	75	17.5	1500	0.06	0.743267	0.671067	1.3077	0.447692	-1	1	1	-1	-1	1	-1	-1	-1	1	-1
15	1	1	-1	1	75	52.5	500	0.06	1.46663	1.88577	4.51603	3.99948	1	-1	1	-1	1	-1	-1	-1	-1	-1	1
16	1	1	1	1	75	52.5	1500	0.06	0.725367	0.8463	1.32913	0.47142	1	1	1	1	1	1	1	1	1	1	1
All	Ra, V		Ra, H		Spk			Obtaining Parameter Coeffiencients by Gradiet					Absolute Parameter Coeffiencients by Gradiet
Default	-1	1	-1	1	-1	1			Ra, V	Ra, H	Spk			Ra, V	Ra, H	Spk
ψ	0.5607	0.8013	0.5988	0.9276	1.0039	1.8416		ψ	0.1203	0.1644	0.41885		ψ	0.1203	0.1644	0.41885
f	0.5814	0.7806	0.6088	0.9176	1.1688	1.6767		f	0.0996	0.1544	0.25395		f	0.0996	0.1544	0.25395
v	0.7655	0.5964	0.875	0.6514	1.6543	1.1912		v	-0.08455	-0.1118	-0.23155		v	0.08455	0.1118	0.23155
d	0.643	0.7189	0.6845	0.8419	1.2976	1.5479		d	0.03795	0.0787	0.12515		d	0.03795	0.0787	0.12515
ψ*f	0.6123	0.7496	0.6526	0.8738	1.1752	1.6703		ψ*f	0.06865	0.1106	0.24755		ψ*f	0.06865	0.1106	0.24755
ψ*v	0.7503	0.6117	0.8442	0.6822	1.633	1.2125		ψ*v	-0.0693	-0.081	-0.21025		ψ*v	0.0693	0.081	0.21025
ψ*d	0.6175	0.7445	0.7284	0.798	1.2904	1.5551		ψ*d	0.0635	0.0348	0.13235		ψ*d	0.0635	0.0348	0.13235
f*v	0.7946	0.5673	0.8337	0.6927	1.6796	1.1659		f*v	-0.11365	-0.0705	-0.25685		f*v	0.11365	0.0705	0.25685
f*d	0.6447	0.7173	0.7082	0.8182	1.2588	1.5868		f*d	0.0363	0.055	0.164		f*d	0.0363	0.055	0.164
v*d	0.6973	0.6646	0.8086	0.7178	1.5791	1.2664		v*d	-0.01635	-0.0454	-0.15635		v*d	0.01635	0.0454	0.15635
ψ*f*v	0.753	0.6089	0.8624	0.6641	1.7248	1.1207		ψ*f*v	-0.07205	-0.09915	-0.30205		ψ*f*v	0.07205	0.09915	0.30205
ψ*f*d	0.6923	0.6696	0.7583	0.7681	1.2647	1.5808		ψ*f*d	-0.01135	0.0049	0.15805		ψ*f*d	0.01135	0.0049	0.15805
f*v*d	0.6832	0.6788	0.7943	0.7321	1.5538	1.2918		f*v*d	-0.0022	-0.0311	-0.131		f*v*d	0.0022	0.0311	0.131
ψ*v*d	0.6792	0.6828	0.8074	0.719	1.6053	1.2402		ψ*v*d	0.0018	-0.0442	-0.18255		ψ*v*d	0.0018	0.0442	0.18255
ψ*f*v*d	0.6953	0.6666	0.7997	0.7267	1.5456	1.2999		ψ*f*v*d	-0.01435	-0.0365	-0.12285		ψ*f*v*d	0.01435	0.0365	0.12285

## Sheet: Linear model
Model generation
	Constant	0.9033	μm
	Gradients
	Single	1	-1	Gradient		Double	1	-1	Gradient		Triple	1	-1	Gradient		Four	1	-1	Gradient
	ψ	1.8416	1.0039	0.41885		ψ*f	1.6703	1.1752	0.24755		ψ*f*v	1.1207	1.7248	-0.30205		ψ*f*v*d	1.2999	1.5456	-0.12285
	f	1.6767	1.1688	0.25395		ψ*v	1.2125	1.633	-0.21025		f*v*d	1.2918	1.5538	-0.131
	v	1.1912	1.6543	-0.23155		ψ*d	1.5551	1.2904	0.13235		ψ*v*d	1.2402	1.6053	-0.18255
	d	1.5479	1.2976	0.12515		f*v	1.1659	1.6796	-0.25685		ψ*f*d	1.5808	1.2647	-0.15805
	ψ2			0.175435		f*d	1.5868	1.2588	0.164
	f2			0.0644906		v*d	1.2664	1.5791	-0.15635
	v2			0.0536154
	d2			0.0156625
	ψ	f	v	d	Results	Model 1	% error	Model 2	% error	Model 3	% error	Model 4	% error	Double	% error	Triple	% error	All 4	% error	Double + 4	% error	Combo 1	% error	Combo 2	% error
0	0.99	0.035	1	0.04	1.19467	1.10031	-0.0789851	0.894664	-0.251118	0.876786	-0.266083	0.876616	-0.266226	0.697659	-0.416022	0.885422	-0.258855	0.90313	-0.244032	0.697488	-0.416165	1.09843	-0.0805556	1.11295	-0.0684007
1	0.5	0.0175	0.5	0.02	1.11157	1.0039	-0.0968629	0.951992	-0.143559	0.949734	-0.145589	0.949724	-0.145599	0.851394	-0.234059	0.901043	-0.189394	0.903289	-0.187373	0.851384	-0.234069	1.00479	-0.0960638	1.06098	-0.0455079
2	1.49	0.0175	0.5	0.02	1.20233	1.41856	0.179838	1.26686	0.0536698	1.26018	0.0481132	1.26015	0.0480865	0.751604	-0.374879	0.896619	-0.254267	0.903268	-0.248737	0.751572	-0.374906	1.42109	0.181945	1.37848	0.146503
3	0.5	0.0525	0.5	0.02	1.0058	1.01279	0.00694509	0.965321	-0.0402457	0.960375	-0.0451631	0.960343	-0.0451952	0.855835	-0.1491	0.898354	-0.106826	0.903268	-0.101941	0.855803	-0.149132	1.01545	0.00959454	1.0631	0.0569693
4	0.5	0.0175	1.5	0.02	0.909833	0.772347	-0.151111	0.612184	-0.327147	0.605412	-0.33459	0.60538	-0.334625	0.743137	-0.183217	0.896529	-0.0146233	0.903268	-0.00721625	0.743104	-0.183252	0.770565	-0.15307	0.950516	0.044714
5	0.5	0.0175	0.5	0.06	1.01617	1.0089	-0.00714798	0.953979	-0.0611978	0.949851	-0.0652606	0.949819	-0.0652924	0.848376	-0.165121	0.899172	-0.115134	0.903268	-0.111103	0.848344	-0.165153	1.00988	-0.00618788	1.0605	0.0436296
6	1.49	0.0525	0.5	0.02	2.17157	1.42745	-0.342665	1.28876	-0.406531	1.27415	-0.413256	1.27406	-0.4133	0.76461	-0.647899	0.888697	-0.590758	0.903204	-0.584077	0.764514	-0.647943	1.43505	-0.339165	1.38917	-0.360289
7	1.49	0.0175	1.5	0.02	1.60687	1.18701	-0.26129	0.718895	-0.552611	0.698852	-0.565084	0.698756	-0.565144	0.435186	-0.729171	0.883257	-0.450323	0.903204	-0.43791	0.43509	-0.729231	1.18158	-0.264666	1.05987	-0.340415
8	1.49	0.0175	0.5	0.06	1.2435	1.42356	0.144805	1.26884	0.0203766	1.25667	0.0105924	1.25658	0.0105151	0.748574	-0.398011	0.891133	-0.283367	0.903204	-0.27366	0.748478	-0.398088	1.42613	0.146869	1.38324	0.112376
9	0.5	0.0525	1.5	0.02	1.01747	0.781235	-0.232176	0.625501	-0.385237	0.610663	-0.39982	0.610566	-0.399915	0.747566	-0.265268	0.888462	-0.12679	0.903203	-0.112302	0.747469	-0.265363	0.775889	-0.237431	0.948206	-0.0680719
10	0.5	0.0525	0.5	0.06	0.9671	1.01779	0.0524159	0.967526	0.000440898	0.960617	-0.00670312	0.960521	-0.00680316	0.853035	-0.117945	0.896391	-0.0731144	0.903203	-0.0660705	0.852938	-0.118045	1.02072	0.0554423	1.06262	0.0987692
11	0.5	0.0175	1.5	0.06	0.952267	0.777353	-0.183681	0.607906	-0.361622	0.59552	-0.374629	0.595423	-0.37473	0.733852	-0.229362	0.890915	-0.0644275	0.903203	-0.0515228	0.733756	-0.229464	0.775603	-0.185519	0.943782	-0.00891041
12	1.49	0.0525	1.5	0.02	1.35557	1.1959	-0.117788	0.740755	-0.453546	0.696947	-0.485863	0.696658	-0.486076	0.448158	-0.669395	0.859492	-0.365954	0.903012	-0.333849	0.447869	-0.669607	1.17962	-0.129793	1.06613	-0.213515
13	0.5	0.0525	1.5	0.06	1.05113	0.786241	-0.252006	0.621417	-0.408813	0.60069	-0.428531	0.6004	-0.428807	0.738475	-0.297448	0.882573	-0.160361	0.90301	-0.140918	0.738185	-0.297724	0.780992	-0.257	0.941472	-0.104327
14	1.49	0.0175	1.5	0.06	1.3077	1.19201	-0.0884648	0.714582	-0.453558	0.678081	-0.48147	0.677793	-0.481691	0.425867	-0.674339	0.8668	-0.337157	0.903012	-0.309466	0.425579	-0.674559	1.18646	-0.0927126	1.05837	-0.190661
15	1.49	0.0525	0.5	0.06	4.51603	1.43245	-0.682807	1.29093	-0.714146	1.27075	-0.718614	1.27046	-0.718678	0.761775	-0.831318	0.88312	-0.804448	0.903012	-0.800043	0.761486	-0.831382	1.44015	-0.681102	1.39394	-0.691336
16	1.49	0.0525	1.5	0.06	1.32913	1.2009	-0.0964767	0.736564	-0.445831	0.676024	-0.49138	0.675159	-0.492031	0.438962	-0.669738	0.842759	-0.365933	0.902435	-0.321035	0.438097	-0.670389	1.18424	-0.109015	1.06464	-0.198997
Min %							0.00694509		0.000440898		0.00670312		0.00680316		0.117945		0.0146233		0.00721625		0.118045		0.00618788		0.00891041
Max % (excluding experiment 15)							0.342665		0.552611		0.565084		0.565144		0.729171		0.590758		0.584077		0.729231		0.339165		0.360289
Average error %							-0.129851		-0.29004		-0.303725		-0.303854		-0.414841		-0.268337		-0.25478		-0.414969		-0.131672		-0.105145

## Sheet: ANOVA
	Tests of Between-Subjects Effects
	Dependent Variable: Spk
	Source	Type III Sum of Squares	df	Mean Square	F	Sig.
	Corrected Model	10.969a	15	0.731	.	.
	Intercept	31.613	1	31.613	.	.
	Power	2.765	1	2.765	.	.	0.252074
	Frequency	0.622	1	0.622	.	.	0.0567053
	Speed	0.867	1	0.867	.	.	0.0790409
	Pitch	0.497	1	0.497	.	.	0.0453095
	Power * Frequency	0.989	1	0.989	.	.	0.0901632
	Power * Speed	0.338	1	0.338	.	.	0.0308141
	Power * Pitch	0.598	1	0.598	.	.	0.0545173
	Frequency * Speed	0.934	1	0.934	.	.	0.0851491
	Frequency * Pitch	0.489	1	0.489	.	.	0.0445802
	Speed * Pitch	0.151	1	0.151	.	.	0.0137661
	Power * Frequency * Speed	1.518	1	1.518	.	.	0.13839
	Power * Frequency * Pitch	0.202	1	0.202	.	.	0.0184155
	Power * Speed * Pitch	0.168	1	0.168	.	.	0.0153159
	Frequency * Speed * Pitch	0.365	1	0.365	.	.	0.0332756
	Power * Frequency * Speed * Pitch	0.464	1	0.464	.	.	0.042301
	Error	0	0	.
	Total	42.582	16
	Corrected Total	10.969	15
	a R Squared = 1.000 (Adjusted R Squared = .)						-1

## Sheet: Crack density calculations
Crack density
	Sample area	0.039375	m2
	Fluence	0.03			0.05			0.07			0.099			0.135			0.149			0.2
	Frequency	Surface	Micro	Deep	Surface	Micro	Deep	Surface	Micro	Deep	Surface	Micro	Deep	Surface	Micro	Deep	Surface	Micro	Deep	Surface	Micro	Deep
	5	0	0	0	3	0	0	3	0	0	0	0	0	4	0	0	0	0	0	3	0	0
	17.5	0	0	0	33	2	0	76	4	5	17	3	0	25	0	0	19	0	0	16	0	0
	28	0	0	0	50	2	0	103	8	3	20	9	9	22	1	0	21	0	0	13	2	4
	40	0	0	0	71	9	0	32	17	1	29	13	11	5	0	0	22	7	3	6	0	0
	52.5	0	0	0	59	10	0	57	13	0	41	3	15	11	1	0	0	1	3	0	0	8
	75	0	0	0	75	7	1	20	15	4	21	12	12	7	4	0	17	0	0	9	0	0
	100	0	0	0	81	5	0	37	15	0	13	14	2	24	3	3	15	5	5	8	0	0
	Crack Density
		0	0	0	76.1905	0	0	76.1905	0	0	0	0	0	101.587	0	0	0	0	0	76.1905	0	0
		0	0	0	838.095	50.7937	0	1930.16	101.587	126.984	431.746	76.1905	0	634.921	0	0	482.54	0	0	406.349	0	0
		0	0	0	1269.84	50.7937	0	2615.87	203.175	76.1905	507.937	228.571	228.571	558.73	25.3968	0	533.333	0	0	330.159	50.7937	101.587
		0	0	0	1803.17	228.571	0	812.698	431.746	25.3968	736.508	330.159	279.365	126.984	0	0	558.73	177.778	76.1905	152.381	0	0
		0	0	0	1498.41	253.968	0	1447.62	330.159	0	1041.27	76.1905	380.952	279.365	25.3968	0	0	25.3968	76.1905	0	0	203.175
		0	0	0	1904.76	177.778	25.3968	507.937	380.952	101.587	533.333	304.762	304.762	177.778	101.587	0	431.746	0	0	228.571	0	0
		0	0	0	2057.14	126.984	0	939.683	380.952	0	330.159	355.556	50.7937	609.524	76.1905	76.1905	380.952	126.984	126.984	203.175	0	0
																					Max	2615.87
	Superficial	1	1	2	2	3	3	3
	Frequency	0.03	0.05	0.07	0.099	0.135	0.149	0.2
1	5	0	76.1905	76.1905	0	101.587	0	76.1905
1	17.5	0	838.095	1930.16	431.746	634.921	482.54	406.349
2	28	0	1269.84	2615.87	507.937	558.73	533.333	330.159
2	40	0	1803.17	812.698	736.508	126.984	558.73	152.381
3	52.5	0	1498.41	1447.62	1041.27	279.365	0	0
3	75	0	1904.76	507.937	533.333	177.778	431.746	228.571
3	100	0	2057.14	939.683	330.159	609.524	380.952	203.175
	Micro
	Frequency	0.03	0.05	0.07	0.099	0.135	0.149	0.2
	5	0	0	0	0	0	0	0
	17.5	0	50.7937	101.587	76.1905	0	0	0
	28	0	50.7937	203.175	228.571	25.3968	0	50.7937
	40	0	228.571	431.746	330.159	0	177.778	0
	52.5	0	253.968	330.159	76.1905	25.3968	25.3968	0
	75	0	177.778	380.952	304.762	101.587	0	0
	100	0	126.984	380.952	355.556	76.1905	126.984	0
	Deep
	Frequency	0.03	0.05	0.07	0.099	0.135	0.149	0.2
	5		0	0	0	0	0	0
	17.5		0	126.984	0	0	0	0
	28		0	76.1905	228.571	0	0	101.587
	40		0	25.3968	279.365	0	177.778	0
	52.5		0	0	380.952	0	25.3968	203.175
	75		25.3968	101.587	304.762	0	0	0
	100		0	0	50.7937	76.1905	126.984	0
	Total Density
	Frequency	0.03	0.05	0.07	0.099	0.135	0.149	0.2
	5	0	3	3	0	4	0	3
	17.5	0	35	85	20	25	19	16
	28	0	52	114	38	23	21	19
	40	0	80	50	53	5	32	6
	52.5	0	69	70	59	12	4	8
	75	0	83	39	45	11	17	9
	100	0	86	52	29	30	25	8
	5	15	0		1	1	1	1
	5	25	3		1	2	1	1
	5	35	3		1	3	1	2
	5	50	0		1	4	1	2
	5	68	4		1	5	1	3
	5	75	0		1	6	1	3
	5	100	3		1	7	1	3
	17.5	15	0		2	1	1	1
	17.5	25	35		2	2	1	1
	17.5	35	85		2	3	1	2
	17.5	50	20		2	4	1	2
	17.5	68	25		2	5	1	3
	17.5	75	19		2	6	1	3
	17.5	100	16		2	7	1	3
	28	15	0		3	1	2	1
	28	25	52		3	2	2	1
	28	35	114		3	3	2	2
	28	50	38		3	4	2	2
	28	68	23		3	5	2	3
	28	75	21		3	6	2	3
	28	100	19		3	7	2	3
	40	15	0		4	1	2	1
	40	25	80		4	2	2	1
	40	35	50		4	3	2	2
	40	50	53		4	4	2	2
	40	68	5		4	5	2	3
	40	75	32		4	6	2	3
	40	100	6		4	7	2	3
	52.5	15	0		5	1	3	1
	52.5	25	69		5	2	3	1
	52.5	35	70		5	3	3	2
	52.5	50	59		5	4	3	2
	52.5	68	12		5	5	3	3
	52.5	75	4		5	6	3	3
	52.5	100	8		5	7	3	3
	75	15	0		6	1	3	1
	75	25	83		6	2	3	1
	75	35	39		6	3	3	2
	75	50	45		6	4	3	2
	75	68	11		6	5	3	3
	75	75	17		6	6	3	3
	75	100	9		6	7	3	3
	100	15	0		7	1	3	1
	100	25	86		7	2	3	1
	100	35	52		7	3	3	2
	100	50	29		7	4	3	2
	100	68	30		7	5	3	3
	100	75	25		7	6	3	3
	100	100	8		7	7	3	3

## Sheet: CD ANOVA
Univariate Analysis of Variance
(calculated with SPSS)
Between-Subjects Factors
		N
Frequency	1.00	14
	2.00	14
	3.00	21
Power	1.00	14
	2.00	14
	3.00	21
Tests of Between-Subjects Effects
Dependent Variable:	Cracks
Source	Type III Sum of Squares	df	Mean Square	F	Sig.
Corrected Model	14207.154a	8	1775.89	2.71535	0.0172739
Intercept	39360.9	1	39360.9	60.183	1.68866e-09
Frequency	3930.63	2	1965.32	3.00498	0.0608365
Power	8492.89	2	4246.45	6.49284	0.00361435
Frequency * Power	1906.97	4	476.743	0.728943	0.577509
Error	26160.8	40	654.02
Total	78226	49
Corrected Total	40368	48
a. R Squared = .352 (Adjusted R Squared = .222)
Frequency	Power	Average Crack Density
1	1	0
1	1	3
1	2	3
1	2	0
1	3	4
1	3	0
1	3	3
1	1	0
1	1	35
1	2	85
1	2	20
1	3	25
1	3	19
1	3	16
2	1	0
2	1	52
2	2	114
2	2	38
2	3	23
2	3	21
2	3	19
2	1	0
2	1	80
2	2	50
2	2	53
2	3	5
2	3	32
2	3	6
3	1	0
3	1	69
3	2	70
3	2	59
3	3	12
3	3	4
3	3	8
3	1	0
3	1	83
3	2	39
3	2	45
3	3	11
3	3	17
3	3	9
3	1	0
3	1	86
3	2	52
3	2	29
3	3	30
3	3	25
3	3	8
